# Supplementary material
Source: PubMed Central journal article supplement (PMC3278998)
Supplement: supp_bbr023_BCImprint_Sup.pdf [file supp_bbr023_BCImprint_Sup.pdf]

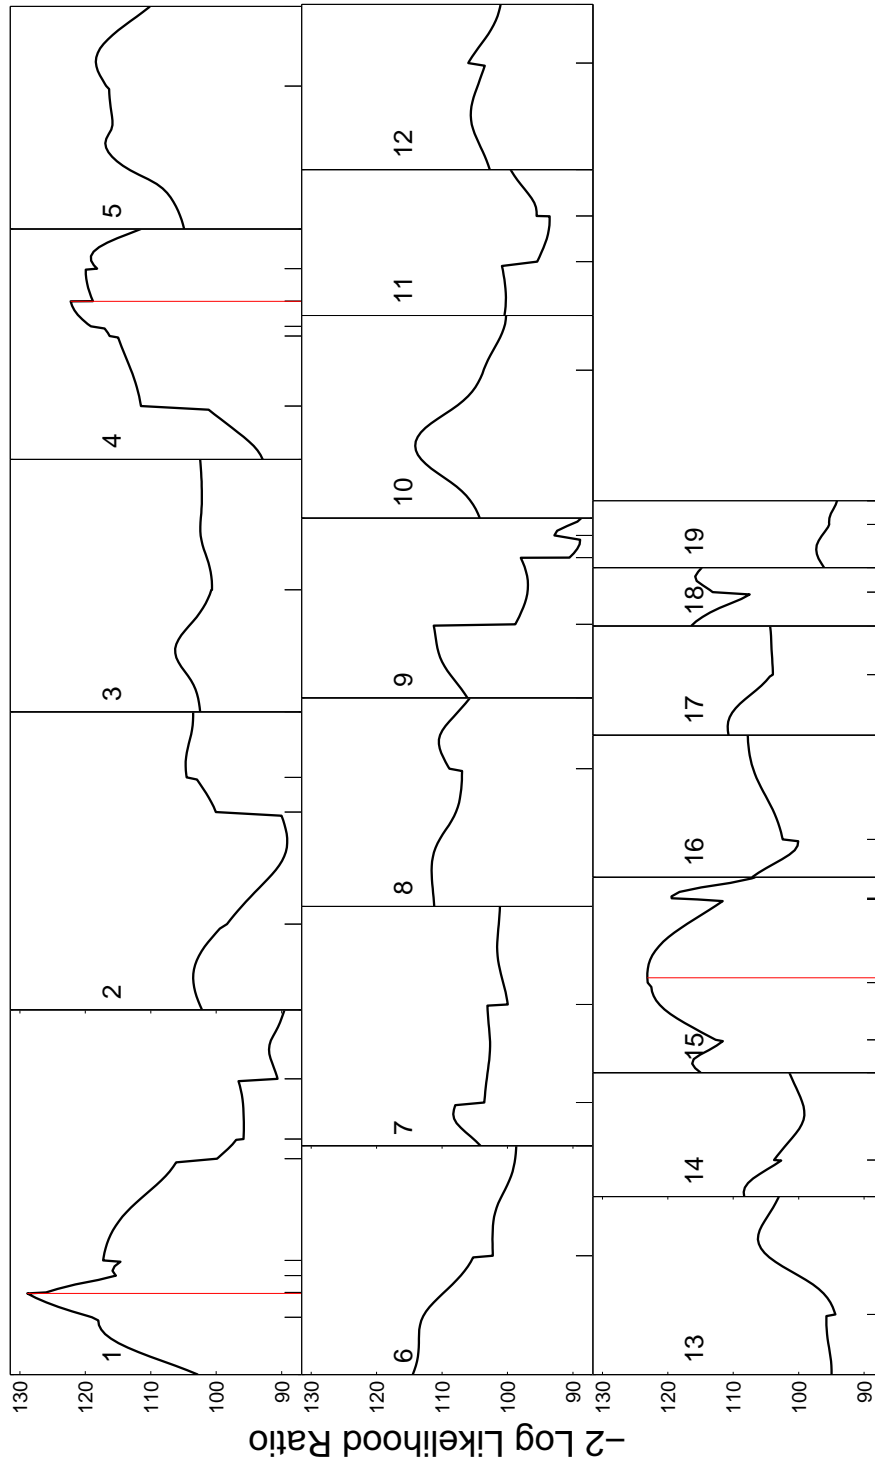

**Supplementary Figure 1.** The plot of log-likelihood ratio across the mouse genome composed of 19 autosomes and one sex chromosome. Ticks on the x-axis are molecular markers. The peaks of the profile, at which significant QTLs on chromosomes 1, 4, and 5 are detected by the new model, are indicated by red vertical lines.
